# Supplementary material for: Mixed-valence dimolybdenum complexes containing hard oxo and soft carbonyl ligands: synthesis, structure, and electrochemistry of Mo2(O)(CO)2(μ-κ2-S(CH2)nS)2(κ2-diphosphine)
Source: Royal Society of Chemistry journal article supplement (doi:10.1039/c8dt02231c), 2018-01-01
Supplement: c8dt02231c1.pdf [file c8dt02231c1.pdf]

**Electronic Supplementary Information (ESI)**

**Mixed-valence dimolybdenum complexes containing hard oxo and soft carbonyl ligands: Synthesis, structure and electrochemistry  $\text{Mo}_2(\text{O})(\text{CO})_2\{\mu\text{-}\kappa^2\text{-S}(\text{CH})_n\text{S}\}_2(\kappa^2\text{-diphosphine})$**

**Mohd. Rezaul Haque,<sup>a</sup> Shishir Ghosh,<sup>a</sup> Md. Matiar Rahman,<sup>a</sup> Tasneem A. Siddiquee,<sup>b</sup> Vladimir N. Nesterov,<sup>c</sup> Michael G. Richmond,<sup>\*,c</sup> Graeme Hogarth,<sup>\*,d</sup> Shariff E. Kabir <sup>\*,a</sup>**

*<sup>a</sup>Department of Chemistry, Jahangirnagar University, Savar, Dhaka 1342, Bangladesh*

*<sup>b</sup>Department of Chemistry, Tennessee State University, 3500 John A. Merritt Blvd. Nashville TN 37209, USA.*

*<sup>c</sup>Department of Chemistry, University of North Texas, 1155 Union Circle, Box 305070, Denton, TX 76203, USA*

*<sup>d</sup>Department of Chemistry, King's College London, Britannia House, 7 Trinity Street, London, SE1 1DB, UK*

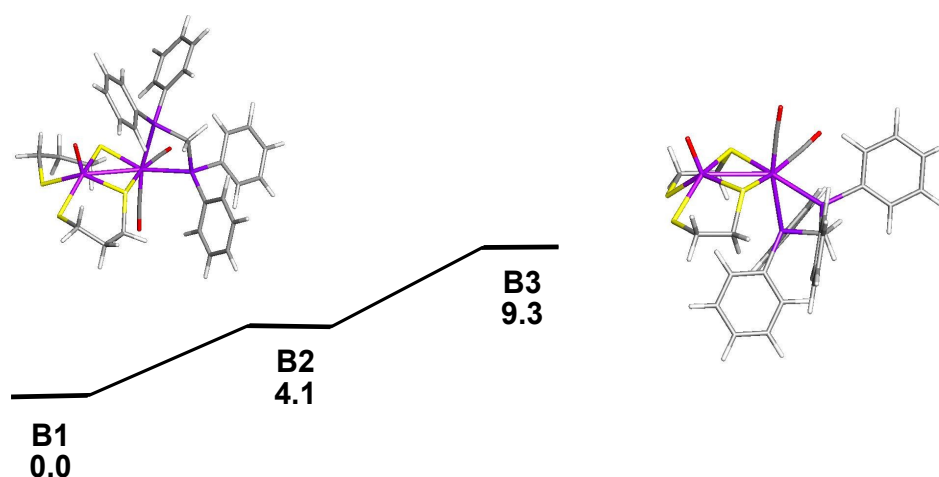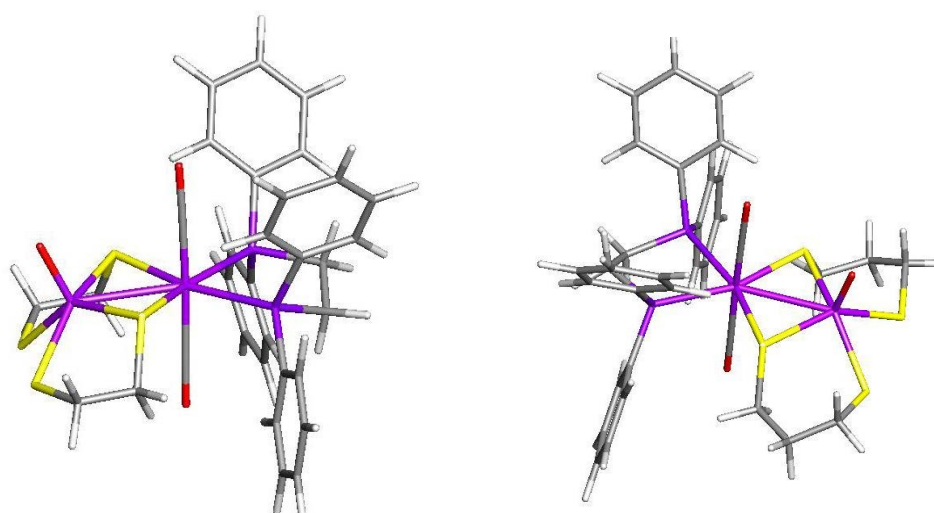

**Figure S1.** Top portion: B3LYP-optimized structures and ground-state energy ordering for the different diastereomers of  $\text{Mo}_2(\text{O})(\text{CO})_2(\mu\text{-}\kappa^2\text{-pdt})_2(\kappa^2\text{-dppm})$  (**2**). The free energy ( $\Delta G$ ) values are in kcal/mol relative to *trans*- $\text{Mo}_2(\text{O})(\text{CO})_2(\mu\text{-}\kappa^2\text{-pdt})_2(\kappa^2\text{-dppm})$  (**B1**). Bottom portion: DFT-optimized structures of  $\text{Mo}_2(\text{O})(\text{CO})_2\{\mu\text{-}\kappa^2\text{-S}(\text{CH}_2)_2\text{S}\}_2(\kappa^2\text{-dppe})$  (**D**-left) and  $[\text{Mo}_2(\text{O})(\text{CO})_2\{\mu\text{-}\kappa^2\text{-S}(\text{CH}_2)_3\text{S}\}_2(\kappa^2\text{-dppe})]$  (**E**-right)].

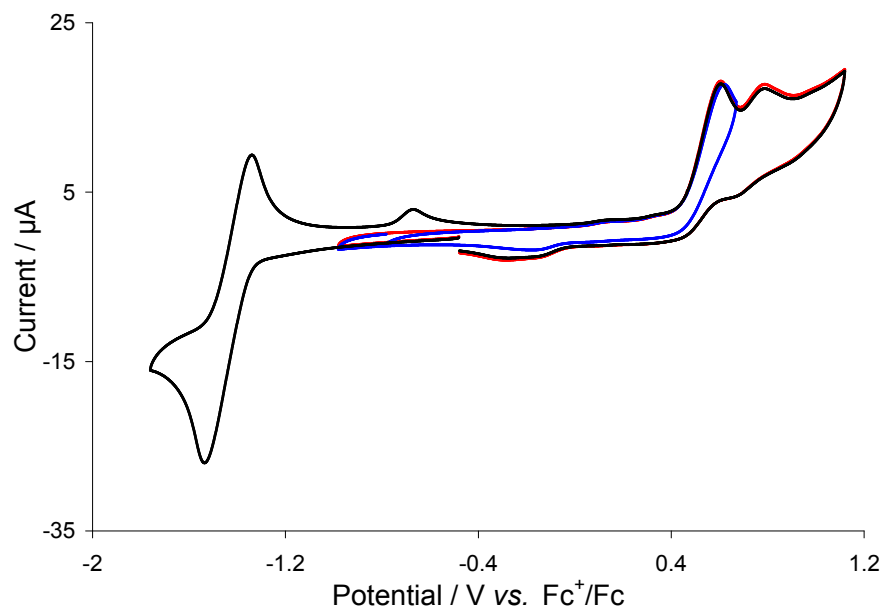

**Fig. S2.** CVs of  $\text{Mo}_2(\text{O})(\text{CO})_2(\kappa^2\text{-dppm})(\mu\text{-}\kappa^2\text{-edt})_2$  (**1**) in MeCN (0.5 mM solution, supporting electrolyte  $[\text{NBu}_4][\text{PF}_6]$ , scan rate  $0.1 \text{ Vs}^{-1}$ , glassy carbon electrode, potential vs  $\text{Fc}^+/\text{Fc}$ ).

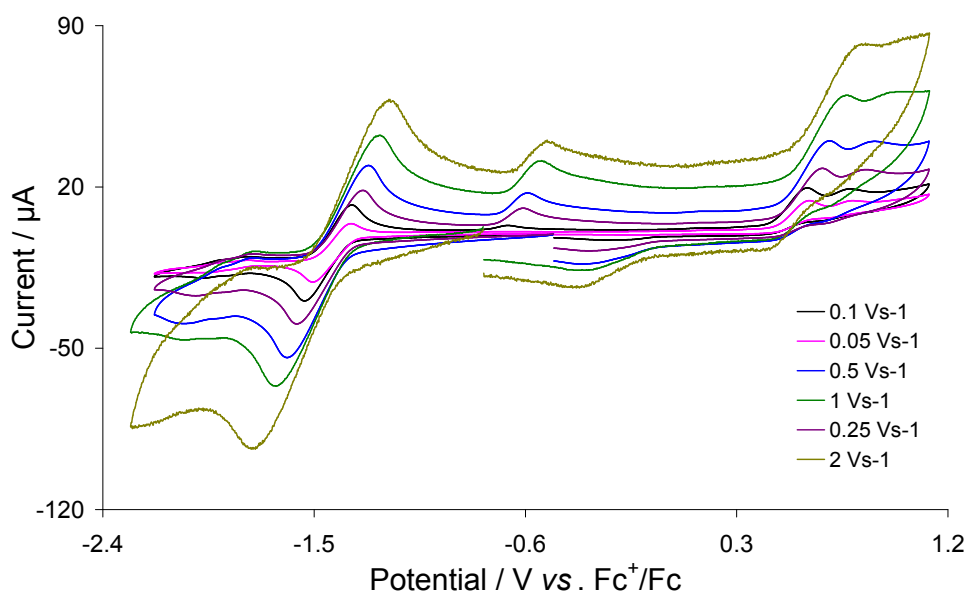

**Fig. S3.** CVs of  $\text{Mo}_2(\text{O})(\text{CO})_2(\kappa^2\text{-dppm})(\mu\text{-}\kappa^2\text{-edt})_2$  (**1**) at various scan rates as shown in the legend (0.5 mM solution in MeCN, supporting electrolyte  $[\text{NBu}_4][\text{PF}_6]$ , scan rate  $0.1 \text{ Vs}^{-1}$ , glassy carbon electrode, potential vs  $\text{Fc}^+/\text{Fc}$ ).

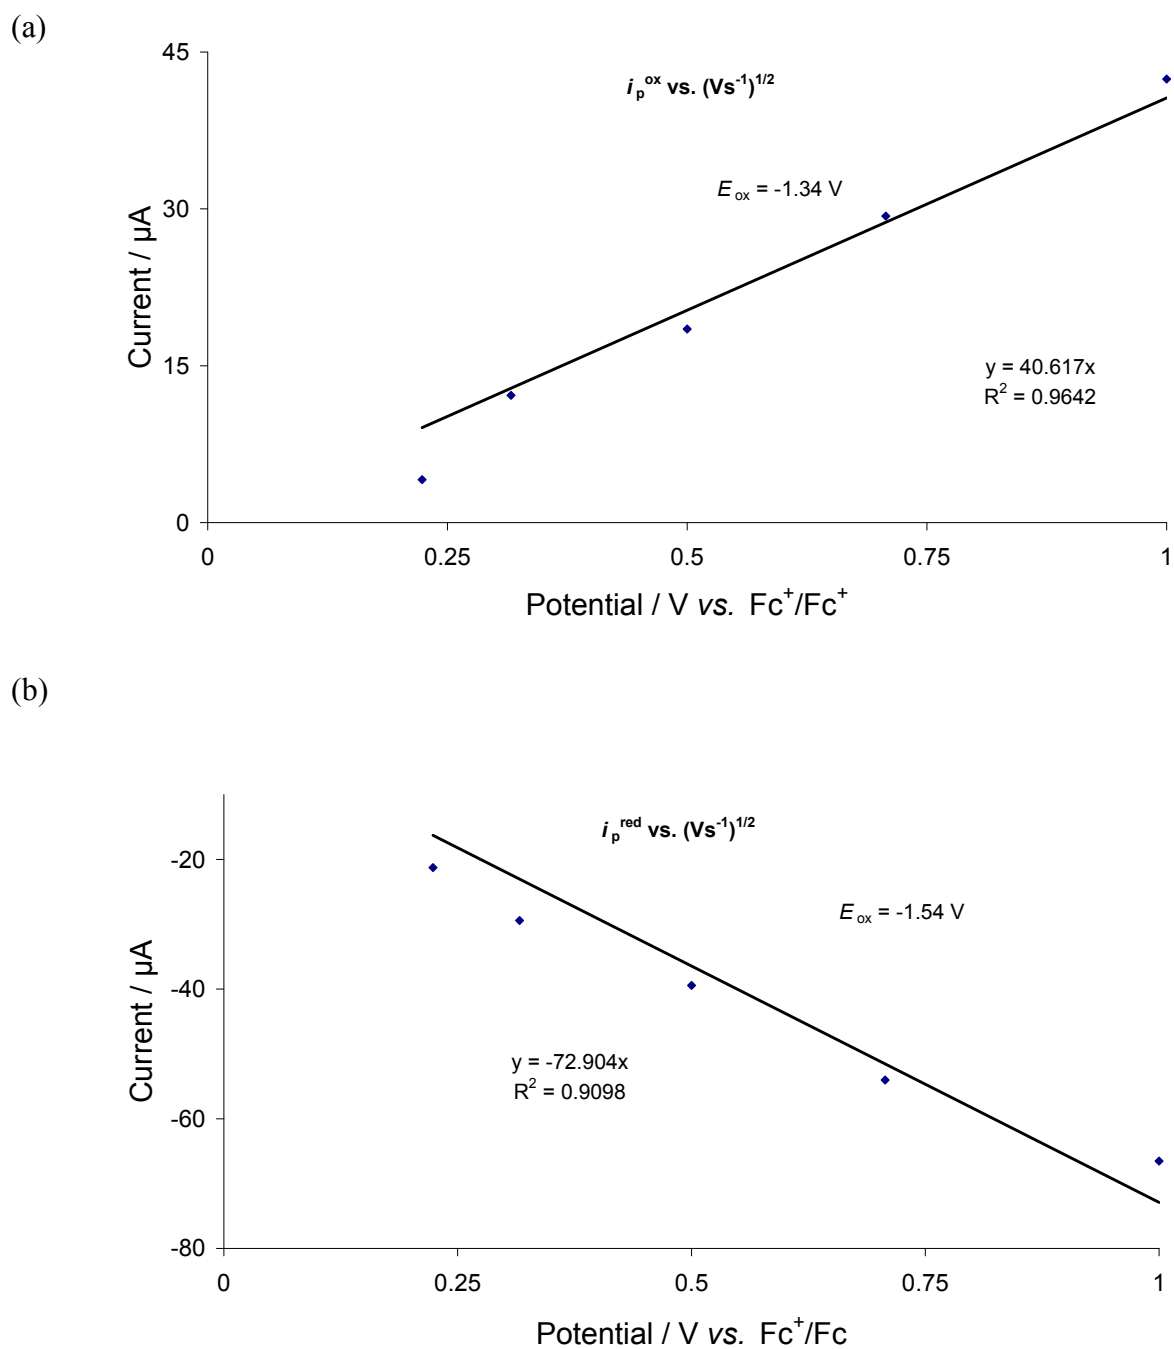

**Fig. S4.** Plots of peak current,  $i_p$ , vs. square root scan rate of the quasi-reversible reduction (at  $E_{1/2} = -1.44$  V) of  $\text{Mo}_2(\text{O})(\text{CO})_2(\kappa^2\text{-dppm})(\mu\text{-}\kappa^2\text{-edt})_2$  (**1**). Line shows best linear fit of data through the origin – (a) for anodic wave; (b) for cathodic wave.

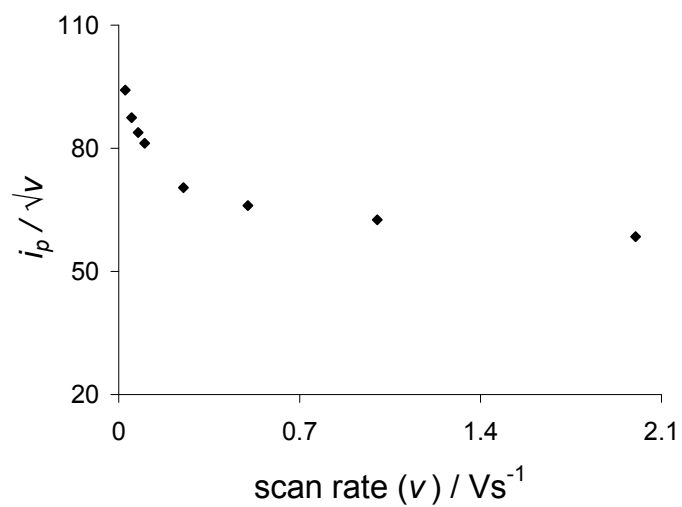

**Fig. S5.** Scan rate ( $v$ ) dependence of the current function ( $i_p/\sqrt{v}$ ) for the reduction of  $\text{Mo}_2(\text{O})(\text{CO})_2(\kappa^2\text{-dppm})(\mu\text{-}\kappa^2\text{-edt})_2$  (**1**) (0.5 mM solution in MeCN, supporting electrolyte  $[\text{NBu}_4][\text{PF}_6]$ , glassy carbon electrode).

**Table S1.** Crystallographic Data and Structure Refinement for *cis-1*, *trans-2* and **5**

| Compound                                                     | <i>Cis-1</i>                                                                                 | <i>Trans-2</i>                                                                               | <b>5</b>                                                           |
|--------------------------------------------------------------|----------------------------------------------------------------------------------------------|----------------------------------------------------------------------------------------------|--------------------------------------------------------------------|
| CCDC registry                                                | 1400764                                                                                      | 1400766                                                                                      | 1400765                                                            |
| Empirical formula                                            | C <sub>31</sub> H <sub>30</sub> Mo <sub>2</sub> O <sub>3</sub> P <sub>2</sub> S <sub>4</sub> | C <sub>33</sub> H <sub>34</sub> Mo <sub>2</sub> O <sub>3</sub> P <sub>2</sub> S <sub>4</sub> | C <sub>31</sub> H <sub>32</sub> MoOP <sub>2</sub> S <sub>3</sub>   |
| Formula weight                                               | 832.61                                                                                       | 860.66                                                                                       | 674.63                                                             |
| Temp (K)                                                     | 296(2)                                                                                       | 293(2)                                                                                       | 293(2)                                                             |
| Wavelength (Å)                                               | 0.71075                                                                                      | 0.71075                                                                                      | 0.71075                                                            |
| Crystal system                                               | Monoclinic                                                                                   | Monoclinic                                                                                   | Monoclinic                                                         |
| Space group                                                  | <i>P2<sub>1</sub>/c</i>                                                                      | <i>P2<sub>1</sub>/n</i>                                                                      | <i>P2<sub>1</sub>/c</i>                                            |
| <i>a</i> /Å                                                  | 16.1232(15)                                                                                  | 12.152(3)                                                                                    | 11.568(17)                                                         |
| <i>b</i> /Å                                                  | 11.4670(11)                                                                                  | 15.879(3)                                                                                    | 15.89(2)                                                           |
| <i>c</i> /Å                                                  | 19.7039(19)                                                                                  | 18.565(4)                                                                                    | 17.05(2)                                                           |
| <i>α</i> /°                                                  | 90                                                                                           | 90                                                                                           | 90                                                                 |
| <i>β</i> /°                                                  | 108.445(8)                                                                                   | 90.143(6)                                                                                    | 103.363(15)                                                        |
| <i>γ</i> /°                                                  | 90                                                                                           | 90                                                                                           | 90                                                                 |
| <i>V</i> /Å <sup>3</sup>                                     | 3455.8(6)                                                                                    | 3582.2(13)                                                                                   | 3049(7)                                                            |
| <i>Z</i>                                                     | 4                                                                                            | 4                                                                                            | 4                                                                  |
| <i>D</i> <sub>calc</sub> (Mg m <sup>-3</sup> )               | 1.600                                                                                        | 1.596                                                                                        | 1.470                                                              |
| <i>μ</i> (Mo K $\alpha$ ) (mm <sup>-1</sup> )                | 1.090                                                                                        | 1.055                                                                                        | 0.764                                                              |
| <i>F</i> (000)                                               | 1672                                                                                         | 1736                                                                                         | 1384                                                               |
| Crystal size (mm <sup>3</sup> )                              | 0.20 × 0.18 × 0.08                                                                           | 0.22 × 0.14 × 0.05                                                                           | 0.20 × 0.18 × 0.08                                                 |
| $\theta$ range (°)                                           | 3.10 to 27.00                                                                                | 3.04 to 27.00                                                                                | 2.22 to 27.00                                                      |
| Index ranges                                                 | -20 ≤ <i>h</i> ≤ 20<br>-14 ≤ <i>k</i> ≤ 14,<br>-25 ≤ <i>l</i> ≤ 25                           | -15 ≤ <i>h</i> ≤ 15<br>-20 ≤ <i>k</i> ≤ 20<br>-23 ≤ <i>l</i> ≤ 23                            | -14 ≤ <i>h</i> ≤ 14<br>-20 ≤ <i>k</i> ≤ 20<br>-21 ≤ <i>l</i> ≤ 21  |
| Reflections collected                                        | 30335                                                                                        | 26643                                                                                        | 26844                                                              |
| Independent reflections                                      | 6321 ( <i>R</i> <sub>int</sub> = 0.1195)                                                     | 7292 ( <i>R</i> <sub>int</sub> = 0.1148)                                                     | 6627 ( <i>R</i> <sub>int</sub> = 0.0501)                           |
| ( <i>R</i> <sub>int</sub> )                                  | 6321 / 0 / 379                                                                               | 7292 / 0 / 397                                                                               | 6627 / 0 / 343                                                     |
| Data/restraints/parameters                                   | 1.019                                                                                        | 1.030                                                                                        | 1.036                                                              |
| Goodness-of-fit on <i>F</i> <sup>2</sup>                     | <i>R</i> <sub>1</sub> = 0.0546,                                                              | <i>R</i> <sub>1</sub> = 0.0567,                                                              | <i>R</i> <sub>1</sub> = 0.0416,                                    |
| Final <i>R</i> indices [ <i>I</i> > 2 $\sigma$ ( <i>I</i> )] | <i>wR</i> <sub>2</sub> = 0.1105                                                              | <i>wR</i> <sub>2</sub> = 0.0900                                                              | <i>wR</i> <sub>2</sub> = 0.1034                                    |
| <i>R</i> indices (all data)                                  | <i>R</i> <sub>1</sub> = 0.1021,<br><i>wR</i> <sub>2</sub> = 0.1288                           | <i>R</i> <sub>1</sub> = 0.1132,<br><i>wR</i> <sub>2</sub> = 0.1002                           | <i>R</i> <sub>1</sub> = 0.0524,<br><i>wR</i> <sub>2</sub> = 0.1096 |
| Largest difference in peak and hole (e Å <sup>-3</sup> )     | 1.274 and -0.531                                                                             | 0.482 and -0.504                                                                             | 0.385 and -0.661                                                   |

## Computational Details

B3LYP geometries and energies for all optimized structures

### Species A1

HF energy= -3837.18727537

No Imaginary frequency

Zero-point correction = 0.537885 (Hartree/Particle)

Thermal correction to Energy = 0.581770

Thermal correction to Enthalpy = 0.582714

Thermal correction to Gibbs Free Energy = 0.456991

Sum of electronic and zero-point Energies = -3836.649390

Sum of electronic and thermal Energies = -3836.605506

Sum of electronic and thermal Enthalpies = -3836.604561

Sum of electronic and thermal Free Energies = -3836.730284

### Coordinates: A1

|    |             |             |             |
|----|-------------|-------------|-------------|
| Mo | 2.31380000  | 0.79710000  | 5.29000000  |
| Mo | 1.37760000  | 1.40630000  | 7.94530000  |
| S  | 3.50530000  | 2.16920000  | 6.95320000  |
| S  | 2.76180000  | 1.23470000  | 9.94740000  |
| S  | 0.03730000  | 0.38610000  | 6.11170000  |
| S  | 0.38390000  | -0.41850000 | 9.20700000  |
| P  | 1.69530000  | -0.35300000 | 3.10550000  |
| P  | 4.21780000  | 0.93370000  | 3.58120000  |
| O  | 0.51140000  | 2.86090000  | 8.02170000  |
| O  | 3.37990000  | -1.94590000 | 6.51270000  |
| O  | 1.20850000  | 3.58670000  | 4.17710000  |
| C  | 2.99140000  | -0.94610000 | 6.07690000  |
| C  | 5.76440000  | -0.07040000 | 3.71110000  |
| C  | 1.62550000  | -2.19240000 | 2.99410000  |
| C  | 1.60510000  | 2.57720000  | 4.57010000  |
| C  | 0.32290000  | 0.19720000  | 2.00900000  |
| C  | 4.80740000  | 2.54650000  | 2.90610000  |
| C  | 3.25430000  | 0.13780000  | 2.18380000  |
| C  | 5.16660000  | 2.70410000  | 1.55640000  |
| C  | 6.24930000  | -0.41880000 | 4.98020000  |
| C  | 6.48540000  | -0.47720000 | 2.57420000  |
| C  | 5.73390000  | 5.02310000  | 1.95620000  |
| C  | 0.33970000  | -0.12250000 | 0.63830000  |
| C  | 0.40640000  | -2.85510000 | 2.77830000  |
| C  | 2.72750000  | -4.35000000 | 3.20300000  |
| C  | 2.78480000  | -2.95550000 | 3.21580000  |
| C  | -0.74110000 | 0.95260000  | 2.52280000  |
| C  | 7.65950000  | -1.21900000 | 2.70730000  |
| C  | 0.35160000  | -4.25140000 | 2.77440000  |
| C  | 4.91450000  | 3.64590000  | 3.77250000  |
| C  | 1.51070000  | -5.00170000 | 2.98350000  |
| C  | -0.68320000 | 0.31730000  | -0.20150000 |
| C  | 4.79000000  | 1.43930000  | 8.06850000  |
| C  | -0.40940000 | -1.30320000 | 6.71050000  |

|   |             |             |             |
|---|-------------|-------------|-------------|
| C | 5.37940000  | 4.87560000  | 3.29860000  |
| C | -0.92780000 | -1.14840000 | 8.13270000  |
| C | 7.42890000  | -1.15730000 | 5.11320000  |
| C | 4.43440000  | 1.86770000  | 9.48360000  |
| C | -1.73880000 | 1.07490000  | 0.31840000  |
| C | 5.62480000  | 3.93520000  | 1.08490000  |
| C | -1.76820000 | 1.38720000  | 1.67810000  |
| C | 8.13400000  | -1.56020000 | 3.97810000  |
| H | 1.14900000  | -0.72330000 | 0.22670000  |
| H | -0.65840000 | 0.06790000  | -1.26030000 |
| H | -2.53580000 | 1.41860000  | -0.33790000 |
| H | -2.58660000 | 1.97470000  | 2.08850000  |
| H | -0.77050000 | 1.19870000  | 3.58040000  |
| H | 5.76010000  | 1.84250000  | 7.74630000  |
| H | 4.46420000  | 2.96080000  | 9.57310000  |
| H | 5.14890000  | 1.44550000  | 10.20230000 |
| H | 4.79590000  | 0.34820000  | 7.97890000  |
| H | -1.82980000 | -0.52470000 | 8.15140000  |
| H | -1.18010000 | -2.12780000 | 8.56040000  |
| H | 0.46350000  | -1.96100000 | 6.66850000  |
| H | -1.18340000 | -1.68400000 | 6.03050000  |
| H | 2.99880000  | 0.88130000  | 1.42120000  |
| H | 3.76690000  | -0.70270000 | 1.70410000  |
| H | -0.50100000 | -2.28290000 | 2.60190000  |
| H | -0.59990000 | -4.75070000 | 2.60290000  |
| H | 1.46680000  | -6.08870000 | 2.97830000  |
| H | 3.63470000  | -4.92610000 | 3.37230000  |
| H | 3.73870000  | -2.46880000 | 3.40890000  |
| H | 6.13850000  | -0.21160000 | 1.57770000  |
| H | 8.20540000  | -1.52930000 | 1.81860000  |
| H | 9.04940000  | -2.13920000 | 4.08040000  |
| H | 7.78940000  | -1.42140000 | 6.10510000  |
| H | 5.69860000  | -0.11820000 | 5.86600000  |
| H | 5.08900000  | 1.86950000  | 0.86240000  |
| H | 5.89460000  | 4.04480000  | 0.03640000  |
| H | 6.08800000  | 5.98320000  | 1.58690000  |
| H | 5.45180000  | 5.72000000  | 3.98050000  |
| H | 4.62000000  | 3.54670000  | 4.81450000  |

---

### Species A2

HF energy= -3837.18106983

No imaginary frequency

Zero-point correction = 0.537856 (Hartree/Particle)

Thermal correction to Energy = 0.581726

Thermal correction to Enthalpy = 0.582670

Thermal correction to Gibbs Free Energy = 0.457022

Sum of electronic and zero-point Energies = -3836.643214

Sum of electronic and thermal Energies = -3836.599344



Sum of electronic and thermal Enthalpies = -3836.598400  
Sum of electronic and thermal Free Energies = -3836.724048

Coordinates: **A2**

|    |             |             |             |
|----|-------------|-------------|-------------|
| Mo | 2.16110000  | 0.67790000  | 5.34940000  |
| Mo | 1.36520000  | 1.71640000  | 7.89990000  |
| S  | 3.48200000  | 2.26590000  | 6.74940000  |
| S  | 2.82780000  | 1.50940000  | 9.82670000  |
| S  | -0.12970000 | 0.70980000  | 6.21850000  |
| S  | 0.16400000  | 0.22080000  | 9.38840000  |
| P  | 1.74280000  | 2.63810000  | 3.59790000  |
| P  | 4.06520000  | 0.92650000  | 3.66000000  |
| O  | 0.67210000  | 3.27060000  | 7.85560000  |
| O  | 3.31090000  | -1.79150000 | 6.89040000  |
| O  | 0.78970000  | -1.50650000 | 3.47490000  |
| C  | 2.85310000  | -0.85960000 | 6.35930000  |
| C  | 4.20720000  | -0.18010000 | 2.19190000  |
| C  | 0.71900000  | 2.16990000  | 2.13890000  |
| C  | 1.29180000  | -0.68210000 | 4.10660000  |
| C  | 1.38900000  | 4.43990000  | 3.78300000  |
| C  | 5.82690000  | 1.09380000  | 4.17470000  |
| C  | 3.53390000  | 2.60250000  | 3.03550000  |
| C  | 6.65540000  | 2.12650000  | 3.71040000  |
| C  | 3.99270000  | -1.55690000 | 2.36230000  |
| C  | 4.60930000  | 0.29420000  | 0.93250000  |
| C  | 8.52210000  | 1.21220000  | 4.95360000  |
| C  | 1.36790000  | 5.29560000  | 2.66670000  |
| C  | -0.62350000 | 1.83430000  | 2.39400000  |
| C  | 0.32280000  | 1.79690000  | -0.23180000 |
| C  | 1.18200000  | 2.14630000  | 0.81490000  |
| C  | 1.15570000  | 4.96960000  | 5.06130000  |
| C  | 4.77260000  | -0.58710000 | -0.13730000 |
| C  | -1.48140000 | 1.49580000  | 1.34720000  |
| C  | 6.36190000  | 0.12040000  | 5.03460000  |
| C  | -1.00960000 | 1.47450000  | 0.03110000  |
| C  | 1.13320000  | 6.66040000  | 2.83060000  |
| C  | 4.79450000  | 1.59970000  | 7.87140000  |
| C  | -0.74720000 | -0.84920000 | 6.99910000  |
| C  | 7.70390000  | 0.17740000  | 5.41620000  |
| C  | -1.22530000 | -0.48720000 | 8.39730000  |
| C  | 4.16330000  | -2.43900000 | 1.29250000  |
| C  | 4.48540000  | 2.10850000  | 9.27030000  |
| C  | 0.90910000  | 7.18470000  | 4.10890000  |
| C  | 7.99530000  | 2.18680000  | 4.10270000  |
| C  | 0.91730000  | 6.33950000  | 5.21890000  |
| C  | 4.54770000  | -1.95540000 | 0.04030000  |
| H  | 1.51890000  | 4.89470000  | 1.66630000  |
| H  | 1.11790000  | 7.31430000  | 1.96080000  |
| H  | 0.72130000  | 8.24930000  | 4.23420000  |
| H  | 0.73280000  | 6.73570000  | 6.21510000  |

|   |             |             |             |
|---|-------------|-------------|-------------|
| H | 1.14560000  | 4.32650000  | 5.93600000  |
| H | 5.75280000  | 1.97800000  | 7.49430000  |
| H | 4.52080000  | 3.20430000  | 9.30210000  |
| H | 5.22010000  | 1.72060000  | 9.98820000  |
| H | 4.79450000  | 0.50700000  | 7.83660000  |
| H | -2.05870000 | 0.22430000  | 8.35140000  |
| H | -1.57010000 | -1.38420000 | 8.92820000  |
| H | 0.06130000  | -1.58530000 | 7.02820000  |
| H | -1.56380000 | -1.22210000 | 6.36670000  |
| H | 4.03700000  | 3.34500000  | 3.66760000  |
| H | 3.74310000  | 2.85050000  | 1.98910000  |
| H | -0.99490000 | 1.83130000  | 3.41740000  |
| H | -2.51700000 | 1.24010000  | 1.56130000  |
| H | -1.67660000 | 1.20260000  | -0.78420000 |
| H | 0.69910000  | 1.77750000  | -1.25270000 |
| H | 2.21530000  | 2.39130000  | 0.58470000  |
| H | 4.81000000  | 1.35240000  | 0.78040000  |
| H | 5.08000000  | -0.20520000 | -1.10870000 |
| H | 4.67470000  | -2.64130000 | -0.79460000 |
| H | 3.98880000  | -3.50250000 | 1.43980000  |
| H | 3.69270000  | -1.94350000 | 3.33340000  |
| H | 6.26430000  | 2.89030000  | 3.04170000  |
| H | 8.62620000  | 2.99620000  | 3.74100000  |
| H | 9.56550000  | 1.26040000  | 5.25790000  |
| H | 8.10620000  | -0.58210000 | 6.08330000  |
| H | 5.72730000  | -0.67720000 | 5.41590000  |

---

### Species A3

HF energy= -3837.17464679

No Imaginary frequency

Zero-point correction = 0.538089 (Hartree/Particle)

Thermal correction to Energy = 0.581854

Thermal correction to Enthalpy = 0.582798

Thermal correction to Gibbs Free Energy = 0.457908

Sum of electronic and zero-point Energies = -3836.636558

Sum of electronic and thermal Energies = -3836.592793

Sum of electronic and thermal Enthalpies = -3836.591848

Sum of electronic and thermal Free Energies = -3836.716738

### Coordinates: A3

|    |            |             |            |
|----|------------|-------------|------------|
| Mo | 2.13420000 | 0.84020000  | 5.26840000 |
| Mo | 1.43440000 | 1.38760000  | 8.07300000 |
| S  | 3.30650000 | 2.36310000  | 6.84600000 |
| S  | 3.08970000 | 1.39420000  | 9.88290000 |
| S  | 0.08220000 | 0.13870000  | 6.44670000 |
| S  | 0.82260000 | -0.48920000 | 9.50270000 |
| P  | 3.46490000 | -1.48060000 | 5.44630000 |
| P  | 4.16690000 | 0.75430000  | 3.75340000 |

|   |             |             |             |
|---|-------------|-------------|-------------|
| O | 0.42240000  | 2.72700000  | 8.28630000  |
| O | 0.84870000  | 3.53610000  | 4.30430000  |
| O | 0.49120000  | -0.10570000 | 2.73210000  |
| C | 1.32430000  | 2.55450000  | 4.69910000  |
| C | 5.75060000  | 1.53060000  | 4.28710000  |
| C | 4.75510000  | -1.96390000 | 6.67180000  |
| C | 1.11340000  | 0.17540000  | 3.66780000  |
| C | 2.64690000  | -3.10820000 | 5.08880000  |
| C | 4.12280000  | 1.14370000  | 1.95410000  |
| C | 4.40660000  | -1.09450000 | 3.86080000  |
| C | 5.07780000  | 0.60450000  | 1.07380000  |
| C | 5.89650000  | 2.91610000  | 4.09200000  |
| C | 6.78570000  | 0.81930000  | 4.91050000  |
| C | 4.04690000  | 1.77060000  | -0.77990000 |
| C | 2.75080000  | -4.19340000 | 5.97490000  |
| C | 4.53880000  | -1.66170000 | 8.02540000  |
| C | 6.83080000  | -3.07860000 | 7.28070000  |
| C | 5.90530000  | -2.69020000 | 6.31090000  |
| C | 1.83620000  | -3.24530000 | 3.94770000  |
| C | 7.94930000  | 1.47870000  | 5.32090000  |
| C | 5.46290000  | -2.06150000 | 8.99710000  |
| C | 3.13600000  | 2.00470000  | 1.45130000  |
| C | 6.61130000  | -2.76280000 | 8.62640000  |
| C | 2.06890000  | -5.38670000 | 5.71920000  |
| C | 4.83800000  | 1.99440000  | 7.81470000  |
| C | -0.08580000 | -1.57060000 | 7.13140000  |
| C | 3.10200000  | 2.31850000  | 0.08870000  |
| C | -0.48260000 | -1.42360000 | 8.59200000  |
| C | 7.05780000  | 3.57010000  | 4.50240000  |
| C | 4.53090000  | 2.36520000  | 9.25810000  |
| C | 1.27760000  | -5.51630000 | 4.57660000  |
| C | 5.03580000  | 0.91240000  | -0.28580000 |
| C | 1.16440000  | -4.44140000 | 3.69040000  |
| C | 8.08940000  | 2.85210000  | 5.11750000  |
| H | 3.36420000  | -4.11300000 | 6.86790000  |
| H | 2.16220000  | -6.21600000 | 6.41750000  |
| H | 0.74940000  | -6.44660000 | 4.37840000  |
| H | 0.54680000  | -4.52800000 | 2.79880000  |
| H | 1.71100000  | -2.41740000 | 3.25530000  |
| H | 5.63430000  | 2.61610000  | 7.38640000  |
| H | 4.32560000  | 3.43900000  | 9.34550000  |
| H | 5.38530000  | 2.12680000  | 9.90570000  |
| H | 5.11020000  | 0.94080000  | 7.71820000  |
| H | -1.44930000 | -0.91450000 | 8.68470000  |
| H | -0.56610000 | -2.40780000 | 9.07160000  |
| H | 0.85280000  | -2.11990000 | 7.02420000  |
| H | -0.86420000 | -2.06720000 | 6.53750000  |
| H | 3.85590000  | -1.53610000 | 3.02240000  |
| H | 5.43870000  | -1.45810000 | 3.80930000  |
| H | 3.65100000  | -1.11640000 | 8.33770000  |

|   |            |             |             |
|---|------------|-------------|-------------|
| H | 5.27570000 | -1.81280000 | 10.03920000 |
| H | 7.33270000 | -3.06910000 | 9.38130000  |
| H | 7.71810000 | -3.63630000 | 6.98740000  |
| H | 6.07520000 | -2.97340000 | 5.27390000  |
| H | 6.69550000 | -0.24620000 | 5.09990000  |
| H | 8.74370000 | 0.91220000  | 5.80260000  |
| H | 8.99510000 | 3.36300000  | 5.43720000  |
| H | 7.15640000 | 4.64160000  | 4.34230000  |
| H | 5.10080000 | 3.48660000  | 3.61710000  |
| H | 5.86120000 | -0.05100000 | 1.45030000  |
| H | 5.77610000 | 0.48630000  | -0.95990000 |
| H | 4.01630000 | 2.01080000  | -1.84070000 |
| H | 2.33140000 | 2.98680000  | -0.28920000 |
| H | 2.39340000 | 2.43020000  | 2.12110000  |

---

### Species B1

HF energy= -3915.80070076

No imaginary frequency

Zero-point correction = 0.596349 (Hartree/Particle)

Thermal correction to Energy = 0.642520

Thermal correction to Enthalpy = 0.643465

Thermal correction to Gibbs Free Energy = 0.513049

Sum of electronic and zero-point Energies = -3915.204351

Sum of electronic and thermal Energies = -3915.158180

Sum of electronic and thermal Enthalpies = -3915.157236

Sum of electronic and thermal Free Energies = -3915.287652

### Coordinates: B1

|    |             |             |             |
|----|-------------|-------------|-------------|
| Mo | -0.21760000 | -0.06040000 | -0.09350000 |
| Mo | -3.00180000 | -0.50600000 | -0.76720000 |
| S  | -1.83020000 | 1.70430000  | -0.59560000 |
| S  | -1.24110000 | -2.25890000 | -0.40230000 |
| S  | -4.51010000 | -2.16510000 | 0.21360000  |
| S  | -4.94000000 | 0.73870000  | 0.06170000  |
| P  | 2.07360000  | -1.13370000 | 0.32170000  |
| P  | 1.59210000  | 1.68830000  | 0.30460000  |
| O  | -3.12270000 | -0.60620000 | -2.45170000 |
| O  | -1.00340000 | 0.00120000  | 2.98580000  |
| O  | 0.33710000  | -0.10740000 | -3.24980000 |
| C  | 2.47930000  | -2.35800000 | 1.65040000  |
| C  | -0.71160000 | -0.02750000 | 1.85990000  |
| C  | 1.80310000  | -2.27180000 | 2.88090000  |
| C  | 2.09680000  | -3.16090000 | 3.91660000  |
| C  | 3.05720000  | -4.15970000 | 3.73360000  |
| C  | 3.72340000  | -4.26210000 | 2.51080000  |
| C  | 3.43920000  | -3.36790000 | 1.47500000  |
| C  | 3.02860000  | -1.74740000 | -1.12700000 |
| C  | 2.36160000  | -2.57040000 | -2.05090000 |

|   |             |             |             |
|---|-------------|-------------|-------------|
| C | 3.03990000  | -3.08970000 | -3.15520000 |
| C | 4.38920000  | -2.78770000 | -3.35590000 |
| C | 5.06250000  | -1.97340000 | -2.44150000 |
| C | 2.89400000  | 0.46330000  | 0.86680000  |
| C | 2.34930000  | 2.62230000  | -1.08950000 |
| C | 1.55010000  | 2.98790000  | -2.18400000 |
| C | 2.09440000  | 3.72250000  | -3.24180000 |
| C | 3.44010000  | 4.09310000  | -3.21890000 |
| C | 3.69890000  | 3.01610000  | -1.06670000 |
| C | 1.49070000  | 2.95680000  | 1.64570000  |
| C | 1.37380000  | 2.55360000  | 2.98750000  |
| C | 1.23450000  | 3.49900000  | 4.00440000  |
| C | 1.19260000  | 4.86190000  | 3.69620000  |
| C | 1.29340000  | 5.27220000  | 2.36560000  |
| C | 1.44360000  | 4.32810000  | 1.34580000  |
| C | -3.81740000 | -3.85860000 | -0.04040000 |
| C | -2.68400000 | -4.25240000 | 0.92070000  |
| C | -1.66460000 | -3.13630000 | 1.17270000  |
| C | 0.15370000  | -0.09150000 | -2.11190000 |
| C | -2.50610000 | 2.57850000  | 0.89080000  |
| C | -3.80120000 | 3.32160000  | 0.54470000  |
| C | -4.75480000 | 2.52740000  | -0.36260000 |
| C | 4.38860000  | -1.46090000 | -1.33020000 |
| C | 4.24200000  | 3.74080000  | -2.12820000 |
| H | -0.72830000 | -3.53530000 | 1.57860000  |
| H | -2.06280000 | -2.39940000 | 1.87400000  |
| H | -3.10260000 | -4.54120000 | 1.89520000  |
| H | -2.17550000 | -5.13870000 | 0.51310000  |
| H | -3.48840000 | -3.94410000 | -1.08070000 |
| H | -4.66610000 | -4.54090000 | 0.08850000  |
| H | -5.76580000 | 2.94670000  | -0.29400000 |
| H | -4.44320000 | 2.60270000  | -1.40890000 |
| H | -3.56470000 | 4.27460000  | 0.04820000  |
| H | -4.30240000 | 3.56740000  | 1.49150000  |
| H | -1.72820000 | 3.26870000  | 1.23620000  |
| H | -2.68190000 | 1.83570000  | 1.67180000  |
| H | 1.53060000  | 4.66440000  | 0.31610000  |
| H | 1.26020000  | 6.33060000  | 2.11520000  |
| H | 1.07870000  | 5.59790000  | 4.48920000  |
| H | 1.15050000  | 3.16790000  | 5.03730000  |
| H | 1.37700000  | 1.49840000  | 3.24910000  |
| H | 0.50160000  | 2.70240000  | -2.20810000 |
| H | 1.46420000  | 3.99590000  | -4.08520000 |
| H | 3.86500000  | 4.65710000  | -4.04660000 |
| H | 5.28960000  | 4.03390000  | -2.10250000 |
| H | 4.32910000  | 2.76940000  | -0.21430000 |
| H | 3.90060000  | 0.64490000  | 0.47710000  |
| H | 2.94610000  | 0.46600000  | 1.96100000  |
| H | 4.93660000  | -0.84590000 | -0.62020000 |
| H | 6.11400000  | -1.73660000 | -2.59040000 |

|   |            |             |             |
|---|------------|-------------|-------------|
| H | 4.91450000 | -3.18360000 | -4.22250000 |
| H | 2.50790000 | -3.72050000 | -3.86400000 |
| H | 1.30720000 | -2.79800000 | -1.90910000 |
| H | 3.96680000 | -3.46060000 | 0.53040000  |
| H | 4.46820000 | -5.04040000 | 2.35740000  |
| H | 3.27950000 | -4.85810000 | 4.53770000  |
| H | 1.56390000 | -3.07870000 | 4.86170000  |
| H | 1.03580000 | -1.51820000 | 3.03240000  |

---

### Species B2

HF energy= -3915.79365691

No Imaginary frequency

Zero-point correction = 0.596052 (Hartree/Particle)

Thermal correction to Energy = 0.642356

Thermal correction to Enthalpy = 0.643300

Thermal correction to Gibbs Free Energy = 0.512564

Sum of electronic and zero-point Energies -3915.197605

Sum of electronic and thermal Energies = -3915.151301

Sum of electronic and thermal Enthalpies = -3915.150357

Sum of electronic and thermal Free Energies = -3915.281093

### Coordinates: B2

|    |             |             |             |
|----|-------------|-------------|-------------|
| Mo | -0.42410000 | 0.18370000  | 0.03250000  |
| Mo | -3.26980000 | -0.08020000 | -0.63260000 |
| S  | -2.02240000 | 2.05320000  | -0.33440000 |
| S  | -1.57970000 | -1.88790000 | -0.51970000 |
| S  | -4.78230000 | -1.76000000 | 0.30870000  |
| S  | -5.17070000 | 1.14720000  | 0.29690000  |
| P  | 0.39280000  | 0.61390000  | -2.44320000 |
| P  | 1.47250000  | 1.87810000  | -0.07730000 |
| O  | -3.44370000 | -0.06290000 | -2.31650000 |
| O  | -0.99400000 | 0.26780000  | 3.11190000  |
| O  | 1.81830000  | -1.89590000 | 0.91280000  |
| C  | 1.58610000  | -0.53930000 | -3.24970000 |
| C  | -0.81500000 | 0.22070000  | 1.95950000  |
| C  | 1.56510000  | -1.90010000 | -2.90860000 |
| C  | 2.45620000  | -2.79480000 | -3.51050000 |
| C  | 3.37880000  | -2.33720000 | -4.45290000 |
| C  | 3.40260000  | -0.98300000 | -4.80560000 |
| C  | 2.50760000  | -0.09100000 | -4.21380000 |
| C  | -0.60600000 | 1.21630000  | -3.87600000 |
| C  | -0.84090000 | 0.37330000  | -4.97530000 |
| C  | -1.65650000 | 0.79100000  | -6.02880000 |
| C  | -2.25220000 | 2.05360000  | -6.00000000 |
| C  | -2.03560000 | 2.89400000  | -4.90540000 |
| C  | 1.44530000  | 2.09350000  | -1.93660000 |
| C  | 1.37300000  | 3.56800000  | 0.64470000  |
| C  | 0.80710000  | 3.72870000  | 1.92030000  |

|   |             |             |             |
|---|-------------|-------------|-------------|
| C | 0.76110000  | 4.99130000  | 2.51920000  |
| C | 1.26580000  | 6.10560000  | 1.84450000  |
| C | 1.88900000  | 4.69200000  | -0.02080000 |
| C | 3.19920000  | 1.36940000  | 0.33920000  |
| C | 3.95040000  | 0.56370000  | -0.53230000 |
| C | 5.22910000  | 0.13190000  | -0.17190000 |
| C | 5.77170000  | 0.48900000  | 1.06420000  |
| C | 5.02840000  | 1.28360000  | 1.94030000  |
| C | 3.75220000  | 1.72200000  | 1.58200000  |
| C | -4.17540000 | -3.44820000 | -0.13430000 |
| C | -2.99840000 | -3.96430000 | 0.70960000  |
| C | -1.91480000 | -2.91560000 | 0.98440000  |
| C | 1.03810000  | -1.13120000 | 0.53760000  |
| C | -2.66490000 | 2.84160000  | 1.21420000  |
| C | -3.93730000 | 3.64730000  | 0.93030000  |
| C | -4.92960000 | 2.95080000  | -0.01360000 |
| C | -1.22540000 | 2.47760000  | -3.84730000 |
| C | 1.82820000  | 5.95420000  | 0.57360000  |
| H | -0.96520000 | -3.38570000 | 1.26440000  |
| H | -2.21350000 | -2.23330000 | 1.78330000  |
| H | -3.36420000 | -4.31860000 | 1.68330000  |
| H | -2.55830000 | -4.83170000 | 0.19590000  |
| H | -3.92080000 | -3.45480000 | -1.19890000 |
| H | -5.04080000 | -4.10890000 | -0.00470000 |
| H | -5.92360000 | 3.40060000  | 0.09690000  |
| H | -4.62780000 | 3.08310000  | -1.05730000 |
| H | -3.67170000 | 4.62290000  | 0.49660000  |
| H | -4.41890000 | 3.84520000  | 1.89830000  |
| H | -1.86670000 | 3.48650000  | 1.59400000  |
| H | -2.85410000 | 2.05050000  | 1.94270000  |
| H | 3.19330000  | 2.34960000  | 2.27150000  |
| H | 5.44150000  | 1.56840000  | 2.90580000  |
| H | 6.76660000  | 0.14930000  | 1.34390000  |
| H | 5.79760000  | -0.48870000 | -0.86140000 |
| H | 3.54560000  | 0.25810000  | -1.49340000 |
| H | 0.40110000  | 2.86630000  | 2.44480000  |
| H | 0.32320000  | 5.10200000  | 3.50900000  |
| H | 1.22170000  | 7.08930000  | 2.30700000  |
| H | 2.22540000  | 6.81870000  | 0.04570000  |
| H | 2.34720000  | 4.58660000  | -1.00210000 |
| H | 0.88160000  | 3.00710000  | -2.15560000 |
| H | 2.42460000  | 2.16620000  | -2.42350000 |
| H | -1.10180000 | 3.13660000  | -2.99220000 |
| H | -2.50290000 | 3.87590000  | -4.86820000 |
| H | -2.88630000 | 2.37880000  | -6.82200000 |
| H | -1.82440000 | 0.12550000  | -6.87300000 |
| H | -0.38370000 | -0.61180000 | -5.01550000 |
| H | 2.52000000  | 0.95580000  | -4.51190000 |
| H | 4.11460000  | -0.62350000 | -5.54590000 |
| H | 4.07620000  | -3.03200000 | -4.91650000 |

|   |            |             |             |
|---|------------|-------------|-------------|
| H | 2.42830000 | -3.84740000 | -3.23740000 |
| H | 0.84830000 | -2.25860000 | -2.17440000 |

---

### Species B3

HF energy= -3915.78547613

No imaginary frequency

Zero-point correction = 0.595811 (Hartree/Particle)

Thermal correction to Energy = 0.642199

Thermal correction to Enthalpy = 0.643143

Thermal correction to Gibbs Free Energy = 0.512615

Sum of electronic and zero-point Energies = -3915.189665

Sum of electronic and thermal Energies = -3915.143277

Sum of electronic and thermal Enthalpies = -3915.142333

Sum of electronic and thermal Free Energies = -3915.272861

### Coordinates: B3

|    |             |             |             |
|----|-------------|-------------|-------------|
| Mo | -0.09270000 | -0.22170000 | -0.39840000 |
| Mo | -3.00570000 | -0.76010000 | -0.49140000 |
| S  | -1.90790000 | 1.45460000  | -0.57130000 |
| S  | -1.17090000 | -2.42310000 | -0.41640000 |
| S  | -4.20170000 | -2.37730000 | 0.91510000  |
| S  | -4.84450000 | 0.46630000  | 0.58000000  |
| P  | 0.29070000  | 0.08970000  | 2.25800000  |
| P  | 1.55680000  | 1.62780000  | 0.14410000  |
| O  | -3.48500000 | -0.96200000 | -2.09860000 |
| O  | 2.45400000  | -1.96900000 | -1.12030000 |
| O  | -0.07050000 | 0.01900000  | -3.52110000 |
| C  | -0.93740000 | 0.55000000  | 3.56430000  |
| C  | 1.54410000  | -1.33730000 | -0.78860000 |
| C  | -0.70980000 | 1.59150000  | 4.48320000  |
| C  | -1.65770000 | 1.89780000  | 5.46210000  |
| C  | -2.84910000 | 1.17040000  | 5.53740000  |
| C  | -3.09090000 | 0.14170000  | 4.62500000  |
| C  | -2.14410000 | -0.16460000 | 3.64370000  |
| C  | 1.48370000  | -0.98230000 | 3.19880000  |
| C  | 2.07010000  | -2.08790000 | 2.56280000  |
| C  | 2.99410000  | -2.89430000 | 3.23500000  |
| C  | 3.34150000  | -2.60900000 | 4.55610000  |
| C  | 2.75780000  | -1.51570000 | 5.20400000  |
| C  | 1.24610000  | 1.69270000  | 1.98690000  |
| C  | 3.36790000  | 1.34170000  | -0.05610000 |
| C  | 3.98800000  | 1.73650000  | -1.25440000 |
| C  | 5.34100000  | 1.47320000  | -1.47120000 |
| C  | 6.09360000  | 0.81110000  | -0.49700000 |
| C  | 4.12850000  | 0.67020000  | 0.91350000  |
| C  | 1.36340000  | 3.36090000  | -0.44660000 |
| C  | 1.89600000  | 4.43420000  | 0.28970000  |
| C  | 1.76170000  | 5.74310000  | -0.17400000 |



|   |             |             |             |
|---|-------------|-------------|-------------|
| C | 1.10530000  | 5.99400000  | -1.38390000 |
| C | 0.58320000  | 4.93310000  | -2.12600000 |
| C | 0.70630000  | 3.62030000  | -1.65910000 |
| C | -3.58250000 | -4.07270000 | 0.52000000  |
| C | -2.24790000 | -4.45020000 | 1.18200000  |
| C | -1.21520000 | -3.31700000 | 1.20360000  |
| C | -0.10550000 | -0.07860000 | -2.36430000 |
| C | -2.42230000 | 2.46190000  | 0.89450000  |
| C | -3.78210000 | 3.12750000  | 0.65070000  |
| C | -4.81760000 | 2.21210000  | -0.02140000 |
| C | 1.83500000  | -0.71150000 | 4.53380000  |
| C | 5.48420000  | 0.41080000  | 0.69350000  |
| H | -0.20680000 | -3.70930000 | 1.37270000  |
| H | -1.43940000 | -2.59730000 | 1.99330000  |
| H | -2.41930000 | -4.75670000 | 2.22360000  |
| H | -1.83190000 | -5.32090000 | 0.65480000  |
| H | -3.51630000 | -4.16540000 | -0.56810000 |
| H | -4.37120000 | -4.75630000 | 0.85560000  |
| H | -5.82740000 | 2.59810000  | 0.16250000  |
| H | -4.67020000 | 2.19530000  | -1.10550000 |
| H | -3.65240000 | 4.02330000  | 0.02600000  |
| H | -4.15790000 | 3.46570000  | 1.62670000  |
| H | -1.64240000 | 3.21720000  | 1.04900000  |
| H | -2.46290000 | 1.80710000  | 1.76520000  |
| H | 0.28330000  | 2.80110000  | -2.23350000 |
| H | 0.07180000  | 5.12150000  | -3.06750000 |
| H | 1.00300000  | 7.01510000  | -1.74540000 |
| H | 2.17330000  | 6.56680000  | 0.40590000  |
| H | 2.42450000  | 4.24950000  | 1.22330000  |
| H | 3.41630000  | 2.25880000  | -2.01840000 |
| H | 5.80650000  | 1.78730000  | -2.40300000 |
| H | 7.14850000  | 0.60660000  | -0.66700000 |
| H | 6.06050000  | -0.10840000 | 1.45640000  |
| H | 3.67330000  | 0.33300000  | 1.84100000  |
| H | 2.12920000  | 1.83600000  | 2.62080000  |
| H | 0.55530000  | 2.52600000  | 2.15820000  |
| H | 1.37510000  | 0.11900000  | 5.06280000  |
| H | 3.01560000  | -1.29150000 | 6.23730000  |
| H | 4.05800000  | -3.23680000 | 5.08190000  |
| H | 3.43730000  | -3.74480000 | 2.72130000  |
| H | 1.81090000  | -2.31840000 | 1.53480000  |
| H | -2.37930000 | -0.94390000 | 2.92280000  |
| H | -4.02370000 | -0.41620000 | 4.65520000  |
| H | -3.58950000 | 1.41340000  | 6.29660000  |
| H | -1.46500000 | 2.70730000  | 6.16350000  |
| H | 0.20790000  | 2.17470000  | 4.44020000  |

---

Species C

HF energy= -3221.38195134  
 No Imaginary frequency  
 Zero-point correction = 0.552756 (Hartree/Particle)  
 Thermal correction to Energy = 0.590774  
 Thermal correction to Enthalpy = 0.591719  
 Thermal correction to Gibbs Free Energy = 0.478362  
 Sum of electronic and zero-point Energies = -3220.829196  
 Sum of electronic and thermal Energies = -3220.791177  
 Sum of electronic and thermal Enthalpies = -3220.790233  
 Sum of electronic and thermal Free Energies = -3220.903590

Coordinates: C

|    |             |             |             |
|----|-------------|-------------|-------------|
| Mo | -0.02240000 | -0.26720000 | -1.19310000 |
| P  | -1.62400000 | 0.50610000  | 0.69930000  |
| S  | -1.97250000 | -0.79330000 | -2.45020000 |
| P  | 1.62200000  | 0.50660000  | 0.64770000  |
| S  | 1.90700000  | -0.91770000 | -2.42190000 |
| S  | -0.11160000 | -2.74440000 | -0.49830000 |
| C  | -2.95550000 | 2.46630000  | -0.80640000 |
| O  | 0.02510000  | 2.54830000  | -2.51670000 |
| C  | 0.01420000  | 1.50600000  | -1.98420000 |
| C  | -2.42010000 | 2.15980000  | 0.45790000  |
| C  | 4.20520000  | -2.84730000 | 2.63590000  |
| C  | 2.64590000  | -0.79290000 | 1.49110000  |
| C  | -3.04010000 | -0.55890000 | 1.25100000  |
| C  | 2.92520000  | 1.77310000  | 0.29270000  |
| C  | 0.69440000  | 1.32730000  | 2.05580000  |
| C  | -0.66910000 | 0.66910000  | 2.29580000  |
| C  | 3.14620000  | 2.24460000  | -1.00830000 |
| C  | -4.37780000 | -0.15900000 | 1.10830000  |
| C  | 1.50100000  | -3.41790000 | -1.10050000 |
| C  | -2.48000000 | -2.50540000 | -1.94210000 |
| C  | -2.77300000 | -1.82680000 | 1.80050000  |
| C  | 3.83310000  | -1.22670000 | 0.87170000  |
| C  | 4.60470000  | -2.24210000 | 1.44010000  |
| C  | -5.14290000 | -2.24900000 | 2.07000000  |
| C  | 4.12380000  | 3.21500000  | -1.25240000 |
| C  | 2.25710000  | -1.40780000 | 2.69220000  |
| C  | -2.51340000 | 3.12270000  | 1.47690000  |
| C  | -3.81460000 | -2.66000000 | 2.21370000  |
| C  | -3.11540000 | 4.36090000  | 1.23700000  |
| C  | -3.64750000 | 4.65130000  | -0.02070000 |
| C  | 1.99630000  | -2.77630000 | -2.38810000 |
| C  | 3.71150000  | 2.28220000  | 1.34330000  |
| C  | -5.41960000 | -0.99950000 | 1.51230000  |
| C  | -1.29360000 | -3.44280000 | -1.75090000 |
| C  | 4.68180000  | 3.25370000  | 1.09870000  |
| C  | -3.57110000 | 3.69770000  | -1.03890000 |
| C  | 3.03020000  | -2.42560000 | 3.26030000  |
| C  | 4.88890000  | 3.72370000  | -0.20250000 |

|   |             |             |             |
|---|-------------|-------------|-------------|
| H | 4.15530000  | -0.76260000 | -0.05730000 |
| H | 5.52330000  | -2.55720000 | 0.94860000  |
| H | 4.80790000  | -3.63760000 | 3.07880000  |
| H | 2.71240000  | -2.88330000 | 4.19530000  |
| H | 1.35170000  | -1.09490000 | 3.20540000  |
| H | 0.56030000  | 2.37260000  | 1.74980000  |
| H | 3.57750000  | 1.91010000  | 2.35710000  |
| H | 5.27950000  | 3.63980000  | 1.92230000  |
| H | 5.64740000  | 4.48020000  | -0.39450000 |
| H | 4.28170000  | 3.56980000  | -2.26870000 |
| H | 2.56130000  | 1.85230000  | -1.83200000 |
| H | 1.42630000  | -3.14040000 | -3.25240000 |
| H | 3.04390000  | -3.06160000 | -2.54700000 |
| H | 2.19330000  | -3.22190000 | -0.27570000 |
| H | 1.38990000  | -4.50500000 | -1.20400000 |
| H | -0.75030000 | -3.56410000 | -2.69400000 |
| H | -1.61590000 | -4.42780000 | -1.39040000 |
| H | -3.12340000 | -2.89990000 | -2.73880000 |
| H | -3.08180000 | -2.44780000 | -1.02760000 |
| H | -1.74850000 | -2.17980000 | 1.89430000  |
| H | -3.58590000 | -3.63440000 | 2.64140000  |
| H | -5.95500000 | -2.90010000 | 2.38720000  |
| H | -6.44990000 | -0.67040000 | 1.39220000  |
| H | -4.61130000 | 0.81220000  | 0.68180000  |
| H | -0.54790000 | -0.35650000 | 2.66170000  |
| H | -1.24530000 | 1.20210000  | 3.06140000  |
| H | 1.29880000  | 1.33120000  | 2.97170000  |
| H | -2.88940000 | 1.73660000  | -1.60890000 |
| H | -3.97840000 | 3.91380000  | -2.02430000 |
| H | -4.11570000 | 5.61580000  | -0.20710000 |
| H | -3.16900000 | 5.09610000  | 2.03770000  |
| H | -2.12150000 | 2.92290000  | 2.47040000  |

---

### Species D

HF energy= -3876.50852020

No Imaginary frequency

Zero-point correction= 0.567776 (Hartree/Particle)

Thermal correction to Energy= .612433

Thermal correction to Enthalpy= 0.613377

Thermal correction to Gibbs Free Energy= 0.487118

Sum of electronic and zero-point Energies= -3875.940744

Sum of electronic and thermal Energies= -3875.896087

Sum of electronic and thermal Enthalpies= -3875.895143

Sum of electronic and thermal Free Energies= -3876.021403

### Coordinates: D

Mo 2.44830000 1.21430000 4.71480000

Mo 1.31250000 3.41940000 6.19210000

|   |             |             |             |
|---|-------------|-------------|-------------|
| S | 3.70490000  | 3.08490000  | 5.71330000  |
| S | 2.19600000  | 4.15300000  | 8.34370000  |
| S | 0.04810000  | 1.78970000  | 4.81360000  |
| S | -0.46720000 | 2.93110000  | 7.77630000  |
| P | 1.71870000  | -0.83720000 | 3.36090000  |
| P | 4.72040000  | 0.15280000  | 4.23090000  |
| O | 1.00230000  | 4.77890000  | 5.22780000  |
| O | 2.25720000  | -0.42090000 | 7.43440000  |
| O | 2.55990000  | 2.97470000  | 2.04100000  |
| C | 2.33000000  | 0.18700000  | 6.44750000  |
| C | 6.01230000  | 0.07000000  | 5.55430000  |
| C | 0.61150000  | -2.06290000 | 4.19780000  |
| C | 2.52330000  | 2.32450000  | 2.99280000  |
| C | 0.90670000  | -0.64500000 | 1.71000000  |
| C | 5.65860000  | 0.74750000  | 2.75470000  |
| C | 3.24430000  | -1.85020000 | 2.91280000  |
| C | 6.25940000  | -0.11860000 | 1.82570000  |
| C | 5.70530000  | -0.55650000 | 6.77620000  |
| C | 7.28860000  | 0.62950000  | 5.38570000  |
| C | 7.08150000  | 1.76920000  | 0.55010000  |
| C | 0.96150000  | -1.68470000 | 0.76240000  |
| C | -0.73410000 | -2.20520000 | 3.82160000  |
| C | 0.26150000  | -3.73180000 | 5.93680000  |
| C | 1.09600000  | -2.83420000 | 5.26840000  |
| C | 0.20190000  | 0.52470000  | 1.38750000  |
| C | 8.23450000  | 0.56280000  | 6.41340000  |
| C | -1.57060000 | -3.09760000 | 4.49800000  |
| C | 5.78680000  | 2.13510000  | 2.56350000  |
| C | -1.07620000 | -3.86420000 | 5.55510000  |
| C | 0.34420000  | -1.54710000 | -0.48130000 |
| C | 4.48930000  | 2.92400000  | 7.38040000  |
| C | -1.04840000 | 0.89350000  | 5.99970000  |
| C | 6.49930000  | 2.64060000  | 1.47430000  |
| C | -1.73100000 | 1.94960000  | 6.85570000  |
| C | 6.65530000  | -0.63020000 | 7.79600000  |
| C | 4.03720000  | 4.12870000  | 8.19060000  |
| C | -0.34720000 | -0.37290000 | -0.79510000 |
| C | 6.95860000  | 0.38950000  | 0.72760000  |
| C | -0.42130000 | 0.65800000  | 0.14250000  |
| C | 7.92280000  | -0.06800000 | 7.61890000  |
| H | 1.47870000  | -2.61310000 | 0.99330000  |
| H | 0.40070000  | -2.35880000 | -1.20380000 |
| H | -0.82770000 | -0.26550000 | -1.76540000 |
| H | -0.95990000 | 1.57410000  | -0.08970000 |
| H | 0.12740000  | 1.33090000  | 2.11000000  |
| H | 5.57560000  | 2.91310000  | 7.22200000  |
| H | 4.38930000  | 5.05900000  | 7.72750000  |
| H | 4.44300000  | 4.07900000  | 9.20960000  |
| H | 4.18310000  | 1.98500000  | 7.84950000  |
| H | -2.35280000 | 2.60860000  | 6.23750000  |

|   |             |             |             |
|---|-------------|-------------|-------------|
| H | -2.37620000 | 1.47700000  | 7.60810000  |
| H | -0.45940000 | 0.20080000  | 6.60710000  |
| H | -1.76660000 | 0.32290000  | 5.39700000  |
| H | 3.54930000  | -1.50960000 | 1.91590000  |
| H | 2.97690000  | -2.91090000 | 2.83360000  |
| H | -1.13210000 | -1.62440000 | 2.99400000  |
| H | -2.61030000 | -3.19420000 | 4.19180000  |
| H | -1.72830000 | -4.55900000 | 6.08000000  |
| H | 0.65720000  | -4.32130000 | 6.76120000  |
| H | 2.12720000  | -2.73440000 | 5.59730000  |
| H | 7.55160000  | 1.11820000  | 4.45220000  |
| H | 9.21800000  | 1.00410000  | 6.26480000  |
| H | 8.66040000  | -0.11980000 | 8.41700000  |
| H | 6.39860000  | -1.11980000 | 8.73310000  |
| H | 4.71900000  | -0.97770000 | 6.94910000  |
| H | 6.19340000  | -1.19650000 | 1.94710000  |
| H | 7.40970000  | -0.29660000 | 0.01360000  |
| H | 7.62650000  | 2.16330000  | -0.30500000 |
| H | 6.58780000  | 3.71700000  | 1.34480000  |
| H | 5.32950000  | 2.82360000  | 3.27030000  |
| C | 4.39830000  | -1.65670000 | 3.90290000  |
| H | 4.15630000  | -2.09430000 | 4.87850000  |
| H | 5.30670000  | -2.16440000 | 3.55600000  |

---

### Species E

HF energy= -3955.12089479

No Imaginary frequency

Zero-point correction= 0.625712 (Hartree/Particle)

Thermal correction to Energy= 0.672898

Thermal correction to Enthalpy= 0.673842

Thermal correction to Gibbs Free Energy= 0.542276

Sum of electronic and zero-point Energies= -3954.495183

Sum of electronic and thermal Energies= -3954.447997

Sum of electronic and thermal Enthalpies= -3954.447053

Sum of electronic and thermal Free Energies= -3954.578619

### Coordinates: E

|    |             |             |             |
|----|-------------|-------------|-------------|
| Mo | -0.16260000 | 0.05780000  | -0.01880000 |
| Mo | -2.95280000 | -0.44230000 | -0.78180000 |
| S  | -1.88800000 | 1.76360000  | -0.37870000 |
| S  | -1.15530000 | -2.14720000 | -0.45900000 |
| S  | -4.41520000 | -2.17330000 | 0.14520000  |
| S  | -5.01000000 | 0.68440000  | -0.07480000 |
| P  | 2.05680000  | -1.20210000 | 0.27230000  |
| P  | 1.42040000  | 2.00210000  | 0.48150000  |
| O  | -3.00660000 | -0.48600000 | -2.47260000 |
| O  | -0.83320000 | -0.18590000 | 3.08190000  |
| O  | 0.42620000  | 0.28540000  | -3.15760000 |

|   |             |             |             |
|---|-------------|-------------|-------------|
| C | 2.18010000  | -2.43980000 | 1.64600000  |
| C | -0.59720000 | -0.09740000 | 1.94690000  |
| C | 2.14940000  | -2.01240000 | 2.98480000  |
| C | 2.20140000  | -2.93530000 | 4.03060000  |
| C | 2.26910000  | -4.30420000 | 3.75680000  |
| C | 2.28920000  | -4.74160000 | 2.43110000  |
| C | 2.24800000  | -3.81780000 | 1.38240000  |
| C | 2.81120000  | -2.12310000 | -1.14420000 |
| C | 2.01230000  | -2.61460000 | -2.18780000 |
| C | 2.58630000  | -3.32090000 | -3.24970000 |
| C | 3.96340000  | -3.54320000 | -3.28410000 |
| C | 4.76870000  | -3.06570000 | -2.24550000 |
| C | 3.42000000  | 0.03300000  | 0.68000000  |
| C | 2.14450000  | 2.91820000  | -0.95150000 |
| C | 1.28490000  | 3.31310000  | -1.99270000 |
| C | 1.77520000  | 4.02330000  | -3.09040000 |
| C | 3.13420000  | 4.33660000  | -3.17480000 |
| C | 3.50670000  | 3.25060000  | -1.04200000 |
| C | 0.91840000  | 3.36250000  | 1.63520000  |
| C | 0.56750000  | 3.04490000  | 2.96030000  |
| C | 0.18050000  | 4.04500000  | 3.85370000  |
| C | 0.12290000  | 5.37780000  | 3.43540000  |
| C | 0.45900000  | 5.70220000  | 2.12010000  |
| C | 0.85770000  | 4.70380000  | 1.22580000  |
| C | -3.68960000 | -3.83560000 | -0.20730000 |
| C | -2.54620000 | -4.25230000 | 0.73270000  |
| C | -1.56540000 | -3.12190000 | 1.06080000  |
| C | 0.22110000  | 0.20210000  | -2.02510000 |
| C | -2.67810000 | 2.44040000  | 1.15620000  |
| C | -3.96770000 | 3.19490000  | 0.81370000  |
| C | -4.83130000 | 2.51190000  | -0.25870000 |
| C | 4.19740000  | -2.36630000 | -1.18190000 |
| C | 3.99820000  | 3.94730000  | -2.14910000 |
| H | -0.62160000 | -3.51280000 | 1.45500000  |
| H | -1.99500000 | -2.43740000 | 1.79530000  |
| H | -2.95840000 | -4.61370000 | 1.68550000  |
| H | -2.00790000 | -5.09520000 | 0.27430000  |
| H | -3.36120000 | -3.85710000 | -1.25100000 |
| H | -4.52300000 | -4.54230000 | -0.11540000 |
| H | -5.85280000 | 2.90880000  | -0.21820000 |
| H | -4.44060000 | 2.72340000  | -1.25920000 |
| H | -3.72210000 | 4.20960000  | 0.46670000  |
| H | -4.54230000 | 3.30270000  | 1.74430000  |
| H | -1.94540000 | 3.10030000  | 1.63040000  |
| H | -2.87800000 | 1.60160000  | 1.82740000  |
| H | 1.12300000  | 4.97600000  | 0.20860000  |
| H | 0.41570000  | 6.73600000  | 1.78330000  |
| H | -0.18540000 | 6.15610000  | 4.13020000  |
| H | -0.08610000 | 3.77870000  | 4.87440000  |
| H | 0.57540000  | 2.01320000  | 3.30080000  |

|   |            |             |             |
|---|------------|-------------|-------------|
| H | 0.22690000 | 3.06650000  | -1.94530000 |
| H | 1.09320000 | 4.32000000  | -3.88430000 |
| H | 3.51810000 | 4.87940000  | -4.03600000 |
| H | 5.05800000 | 4.18780000  | -2.20540000 |
| H | 4.20050000 | 2.97420000  | -0.25260000 |
| H | 3.87300000 | 0.31130000  | -0.27930000 |
| H | 4.19460000 | -0.45170000 | 1.28630000  |
| H | 4.83990000 | -2.01890000 | -0.37620000 |
| H | 5.84270000 | -3.24010000 | -2.26080000 |
| H | 4.40940000 | -4.08790000 | -4.11390000 |
| H | 1.95010000 | -3.69040000 | -4.05100000 |
| H | 0.93890000 | -2.45680000 | -2.16990000 |
| H | 2.27400000 | -4.17420000 | 0.35630000  |
| H | 2.34100000 | -5.80500000 | 2.20650000  |
| H | 2.30300000 | -5.02380000 | 4.57200000  |
| H | 2.18060000 | -2.58300000 | 5.05990000  |
| H | 2.07340000 | -0.95470000 | 3.22300000  |
| C | 2.88740000 | 1.28410000  | 1.38500000  |
| H | 3.67760000 | 2.03310000  | 1.51780000  |
| H | 2.52270000 | 1.04040000  | 2.38930000  |
